# Supplementary material for: Detection of CRISPR adaptation
Source: Oxford University Press journal article supplement (doi:10.1042/bst20190662), 2020-02-03
Supplement: bst-2019-0662c_supp.pdf [file bst-2019-0662c_supp.pdf]

## Supplementary Data

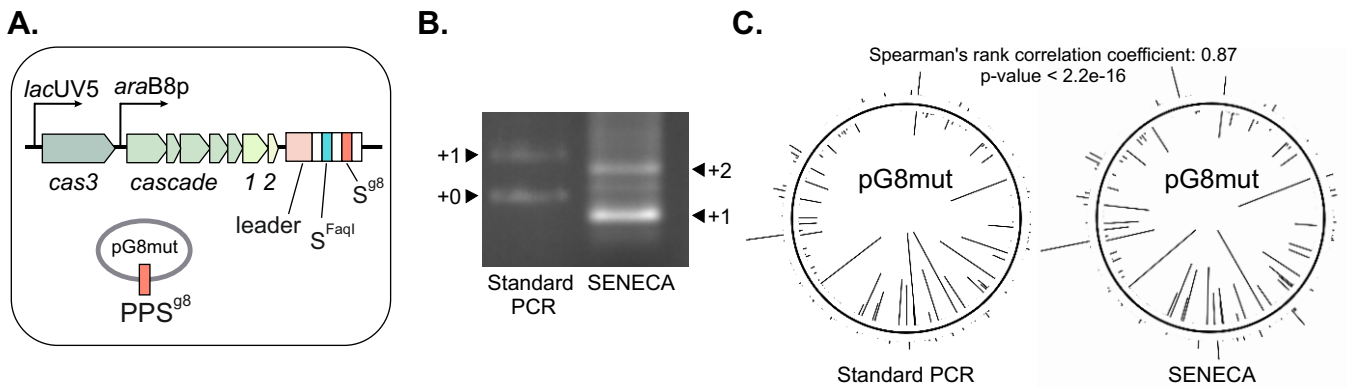

**Supplementary Figure 1. Analysis of primed adaptation by SENECA reveals no biases in amplification of individual spacers compared with standard PCR.**

**A.** Schematic representation of an *E. coli* strain KD263\_FaqI cell used to monitor primed adaptation by SENECA. The *lacUV5* and *araB8p* promoters direct inducible transcription of *cas* genes (shown as block arrows). The engineered CRISPR array contains the leader (light peach rectangle), three CRISPR repeats (white rectangles), spacer  $S^{\text{FaqI}}$  with an *FaqI* recognition site (turquoise rectangle), and spacer  $S^{\text{g8}}$  (dark peach rectangle) matching priming protospacer  $\text{PPS}^{\text{g8}}$  (dark peach rectangle) of plasmid  $\text{pG8mut}$ . **B.** Agarose gel electrophoresis analysis of primed adaptation in induced KD263\_FaqI culture by standard PCR and SENECA. Amplicons corresponding to unexpanded and expanded arrays revealed by standard PCR (left lane) are labeled +0 and +1, respectively. Amplicons corresponding to arrays expanded by one or two spacers amplified by SENECA (right lane) are labeled +1 and +2. **C.** HTS of acquired spacers revealed by standard PCR and SENECA. +1 amplicons from panel **B** were subjected to HTS. Spacers were extracted from reads and mapped to the  $\text{pG8mut}$  plasmid. Each bar represents an individual protospacer. Bars oriented inside or outside the plasmid circles represent protospacers located on different DNA strands. The bar heights are proportional to the number of HTS reads containing corresponding spacers. Spearman's rank correlation coefficient between the numbers of spacers obtained by standard protocol and SENECA is shown above.

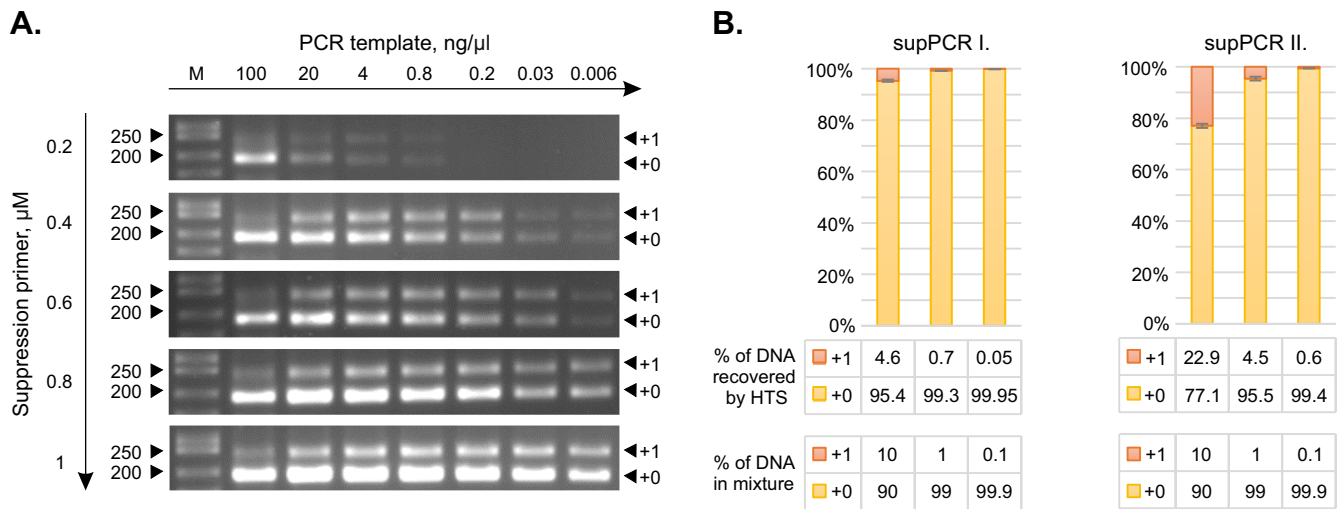

**Supplementary Figure 2. Optimizing supPCR conditions to obtain increased sensitivity of CRISPR adaptation detection.**

**A.** Genomic DNA purified from an *E. coli* strain with one additional spacer (+1) was mixed with DNA from a parental strain with unexpanded (+0) array in the ratio of 10% to 90% and used as a template for the first stage of supPCR. The products were diluted to concentrations indicated at the top and used as a template for the second stage supPCR in the presence of a suppression primer at concentrations indicated on the left. Products of the second stage supPCR corresponding to unexpanded (+0) and expanded (+1) arrays separated by agarose gel electrophoresis are shown. M, molecular-weight size marker. **B.** Genomic DNA purified from an *E. coli* strain with one additional spacer (+1) was mixed with DNA from a strain with unexpanded (+0) array in proportions indicated at the bottom. The mixtures were used as a template for the first and second stages of supPCR (“supPCR I” and “supPCR II”) followed by high-throughput sequencing. Percentages of recovered reads corresponding to unexpanded and expanded CRISPR arrays are indicated in bar plots and tables immediately below.

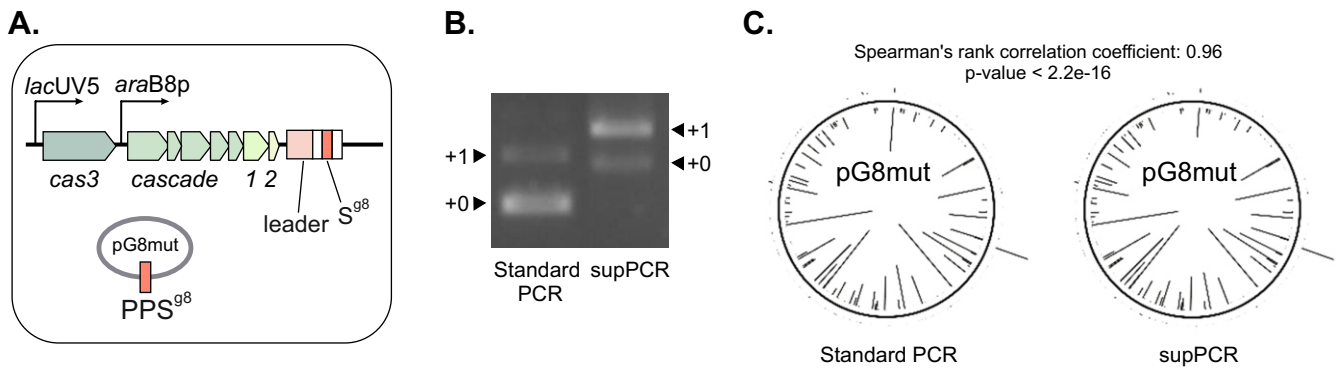

**Supplementary Figure 3. Analysis of primed adaptation by supPCR reveals no biases in amplification of individual spacers compared with standard PCR.**

**A.** Schematic representation of an *E. coli* strain KD263 cell used to monitor primed adaptation by supPCR. The *lacUV5* and *araB8p* promoters direct inducible transcription of *cas* genes (shown as block arrows). The engineered CRISPR array contains the leader (light peach rectangle), two CRISPR repeats (white rectangles), and spacer  $S^{g8}$  (dark peach rectangle) matching priming protospacer PPS<sup>g8</sup> (dark peach rectangle) of plasmid pG8mut. **B.** Agarose gel electrophoresis analysis of primed adaptation in induced KD263 culture by standard PCR and supPCR. Amplicons corresponding to unexpanded and expanded arrays are labeled +0 and +1, respectively. **C.** HTS of acquired spacers revealed by standard PCR and supPCR. The +1 amplicons from panel **B** were subjected to HTS. See Supplementary Figure 1 panel C legend for details.

## Supplementary Methods

### Bacterial strains and plasmids

The *E. coli* strains used in this study are listed in Supplementary Table 1. The KD263\_FaqI strain is a derivative of KD263 strain [1] with an additional spacer  $S^{\text{FaqI}}$  containing FaqI recognition site (Fig. 3A, Supplementary Fig. 1A). To obtain KD263\_FaqI, primed adaptation was induced in KD263 transformed with a pG8mut\_FaqI plasmid described below (Fig. 3A). After induction of primed adaptation, individual colonies that lost Amp-resistance were selected and tested by PCR with primers Ec\_LDR\_F and M13\_G8 (Supplementary Table 2). Amplicons corresponding to arrays expanded by a single spacer-repeat unit were subjected to Sanger sequencing. Screening of ~100 clones allowed to identify several colonies with the  $S^{\text{FaqI}}$  insertion.

Plasmid pG8mut\_FaqI is a derivative of pG8mut [2] with a modified hot protospacer HS1 (GCTTTCCTATAGTGAGTCGTATTAGAGCTTGG) [3]. Modified HS1,  $PS^{\text{FaqI}}$  (GTCCCCCCTATAGTGAGTCGTATTAGAGCTTGG), contains the FaqI recognition site (underlined). To construct pG8mut\_FaqI, plasmid pG8mut was amplified with primers Faq\_HS1\_pIF and Faq\_HS1\_pIR (Supplementary Table 2) using iProof High-Fidelity DNA Polymerase (Bio-Rad) according to the manufacturer's instructions. The resulting PCR product was purified and treated with 0.05 U/ $\mu$ l DpnI (Thermo Fisher Scientific). After 5'-phosphorylation with T4 polynucleotide kinase (Thermo Fisher Scientific) DNA was precipitated, diluted in 5  $\mu$ l of sterile Milli-Q water and circularized with Gibson Assembly Master Mix (NEB) following manufacturer's instructions. The ligation mixture was transformed into competent *E. coli* DH5 $\alpha$  cells and plasmids with desired sequence were selected by Sanger sequencing.

### Primed adaptation assay

The same protocol was used to induce primed adaptation in KD263 transformed with pG8mut\_FaqI to obtain the KD263\_FaqI strain, in KD263\_FaqI transformed with pG8mut to monitor spacer acquisition by SENECA, or in KD263 transformed with pG8mut to monitor spacer acquisition by supPCR.

Overnight cultures obtained from individual transformant colonies were grown in liquid LB supplemented with 100  $\mu$ g/ml ampicillin, diluted 100-fold in LB without antibiotics and grown at 37 °C until culture OD<sub>600</sub> reached 0.3-0.4. CRISPR interference/primed adaptation was induced by the addition of 1 mM IPTG and 1 mM L-(+)-arabinose as described [4]. After 6

hours growth cells were either plated to select the KD263\_FaqI strain (above) or processed for total genomic DNA purification by GeneJET Genomic DNA Purification Kit (Thermo Fisher Scientific) and subsequent analysis of spacer acquisition by standard PCR, SENECA, or supPCR.

### **Detection of spacer acquisition by standard PCR**

CRISPR arrays were amplified by PCR in a 25- $\mu$ l reaction containing 30 ng of total genomic DNA, 2.5 U of Taq DNA Polymerase ( $\alpha$ Ferment), 1 $\times$  Taq buffer ( $\alpha$ Ferment), 0.2 mM dNTPs (Thermo Fisher Scientific), 0.5  $\mu$ M primer annealing to the leader sequence (Ec\_LDR\_F, Supplementary Table 2), and 0.5  $\mu$ M primer annealing to the preexisting spacer (M13\_G8 for KD263 strain or HS1\_qPCR\_adaptation for KD263\_FaqI strain, Supplementary Table 2). The PCR cycling conditions were as follows: 3 min at 95  $^{\circ}$ C followed by 32 cycles of 15 sec at 95  $^{\circ}$ C, 30 sec at 55  $^{\circ}$ C, and 30 sec at 72  $^{\circ}$ C with a final extension of 5 min at 72  $^{\circ}$ C.

### **Detection of spacer acquisition by SENECA**

For analysis of adaptation by SENECA, CRISPR arrays were first amplified by PCR in a 25- $\mu$ l reaction containing 30 ng of total genomic DNA, 2.5 U of Taq DNA Polymerase ( $\alpha$ Ferment), 1 $\times$  Taq buffer ( $\alpha$ Ferment), 0.2 mM dNTPs (Thermo Fisher Scientific), 0.5  $\mu$ M Ec\_LDR\_F primer (anneals to the leader sequence), and 0.5  $\mu$ M HS1\_qPCR\_adaptation primer annealing to S<sup>FaqI</sup> spacer (Supplementary Table 2). The PCR cycling conditions were as follows: 3 min at 95  $^{\circ}$ C followed by 35 cycles of 15 sec at 95  $^{\circ}$ C, 30 sec at 50  $^{\circ}$ C, and 30 sec at 72  $^{\circ}$ C with a final extension of 5 min at 72  $^{\circ}$ C.

The PCR product was purified with the GeneJET PCR Purification Kit (Thermo Fisher Scientific), treated with FaqI restriction endonuclease and ligated to Illumina adapter according to [5]. Oligonucleotides FaqI\_adapter\_F and FaqI\_adapter\_R (Supplementary Table 2) were annealed by heating at 95  $^{\circ}$ C for 5 min and cooling the mixture to 25  $^{\circ}$ C to form a double-stranded Illumina adapter (FaqI\_adapter) with an overhang mimicking the sticky end generated by FaqI. The cleavage of CRISPR array amplicons by FaqI and simultaneous ligation of the FaqI\_adapter was performed in a 50- $\mu$ l reaction containing 20 – 200 ng of DNA, 0.01  $\mu$ M FaqI\_adapter, 1 mM ATP (NEB), 1 mM DTT (VWR Life Science AMRESCO), 0.2 U of T4 DNA Ligase (Thermo Fisher Scientific), 1  $\mu$ L of FastDigest FaqI restriction endonuclease (Thermo Fisher Scientific), and 1 $\times$  FastDigest buffer (Thermo Fisher Scientific). 99 cycles of 3 min at 37  $^{\circ}$ C and 3 min at 20  $^{\circ}$ C were performed. Reaction products were purified with the GeneJET PCR Purification Kit (Thermo Fisher Scientific), resuspended in 15  $\mu$ l of MQ. 3  $\mu$ l

aliquots (3ng/μl) were used for amplification of CRISPR arrays ligated to the *FaqI*\_adapter in a 100-μl reaction with 2.5 U of Taq DNA Polymerase (αFerment), 1× Taq buffer (αFerment), 0.2 mM dNTPs (Thermo Fisher Scientific), 0.5 μM primer *FaqI*\_adapter\_PRIMER annealing to the Illumina adapter, and 0.5 μM primer *CRISPR\_array\_for* annealing to CRISPR repeat not cleavable by the *FaqI* (Figure 2D, oligonucleotide sequences are available in Supplementary Table 2). The PCR cycling conditions were as follows: 3 min at 95 °C followed by 35 cycles of 15 sec at 95 °C, 30 sec at 52 °C, and 30 sec at 72 °C with a final extension of 5 min at 72 °C.

### **Detection of spacer acquisition by supPCR**

For analysis of adaptation by supPCR, two consecutive PCR reactions were performed. At the first stage, CRISPR arrays were amplified by standard PCR in a 25-μl reaction containing 20 ng of total genomic DNA, 2.5 U of Taq DNA Polymerase (αFerment), 1× Taq buffer (αFerment), 0.2 mM dNTPs (Thermo Fisher Scientific), and 0.5 μM primers containing the ITR sequence on 5' ends and annealing to the leader sequence (*KD263\_Ist\_F*, Supplementary Table 2) and preexisting spacer (*KD263\_Ist\_R*, Supplementary Table 2). The PCR cycling conditions were as follows: 3 min at 95 °C followed by 20 cycles of 15 sec at 95 °C, 30 sec at 55 °C, and 30 sec at 72 °C with a final extension of 5 min at 72 °C.

The amplified DNA was diluted 100-fold and 1 μl of the mixture was used as a template for the second stage PCR reaction performed in a total volume of 20 μl and containing 1× Q5 high-fidelity polymerase master mix (NEB) and 0.4 μM suppression primer (*ITR\_primer*, Supplementary Table 2). The PCR cycling conditions were as follows: 30 sec at 98 °C followed by 40 cycles of 30 sec at 98 °C, 30 sec at 57.3 °C, and 30 sec at 72 °C with a final extension of 2 min at 72 °C.

### **High-throughput sequencing of CRISPR arrays**

HTS libraries were generated using NEBNext Ultra II DNA Library Prep Kit (NEB) and sequenced at the MiSeq Illumina platform in a pair-end 150-bp read mode. Raw sequencing data were analyzed using ShortRead and BioStrings packages [6,7]. Sequencing reads were filtered for quality scores of  $\geq 20$  and reads containing two repeats (with up to two mismatches) were selected. Reads that contained 33-bp sequences between two parts of CRISPR repeats (*AGCGGGGATAAACCG* and *GTGTTCCCCGCGCC*) were next selected. The 33-bp segments were considered as spacers. For reads corresponding to multiple spacer acquisition events, only spacers that were acquired first were selected for further analysis. Spacers were

next mapped onto the pG8mut plasmid with no mismatches allowed. Read mapping and spacer statistics analysis was performed with R [1]. Graphical representation was carried out using the EasyVisio tool developed by Ekaterina Rubtsova.

**Supplementary Table 1. Strains used in this study**

| Name       | Description                                                                                                                                                                                                                                                   | Source                             |
|------------|---------------------------------------------------------------------------------------------------------------------------------------------------------------------------------------------------------------------------------------------------------------|------------------------------------|
| KD263      | K-12 F <sup>+</sup> , <i>lacUV5-cas3 araBp8-cseI</i> , CRISPR I: repeat-S <sup>g8</sup> -repeat, CRISPR II deleted.<br>S <sup>g8</sup> (CTGTCTTTCGCTGCTGAGGGTGACGATCCCCGC)<br>targets g8 gene of M13 phage.                                                   | Shmakov <i>et al.</i> <sup>1</sup> |
| KD263_FaqI | A derivative of KD263 with an additional spacer S <sup>FaqI</sup> in CRISPR I: repeat-S <sup>FaqI</sup> -repeat-S <sup>g8</sup> -repeat.<br>S <sup>FaqI</sup> ( <u>GTCCCCCTATAGT</u> GAGTCGTATTAGAGCTTGG)<br>contains the FaqI recognition site (underlined). | This study                         |



**Supplementary Table 2. Oligonucleotides used in this study**

| Name                | Sequence (5' to 3')                                                 | Description                                                                                  |
|---------------------|---------------------------------------------------------------------|----------------------------------------------------------------------------------------------|
| Faq_HS1_plF         | CCTGCAGGCATGCAAGTCCCCCCTA<br>TAGTGAGTCGTATTA                        | pG8mut_FaqI construction                                                                     |
| Faq_HS1_plR         | TAATACGACTCACTATAGGGGGGAC<br>TTGCATGCCTGCAGG                        |                                                                                              |
| Ec_LDR_F            | AAGGTTGGTGGGTTGTTTTATGG                                             | Anneals to the leader sequence<br>(standard PCR; SENECA 1 <sup>st</sup><br>stage PCR)        |
| M13_G8              | GGATCGTCACCCTCAGCAGCG                                               | Anneals to S <sup>g8</sup> spacer (standard<br>PCR)                                          |
| HS1_qPCR_adaptation | CCAAGCTCTAATACGAC                                                   | Anneals to S <sup>FaqI</sup> spacer (standard<br>PCR; SENECA 1 <sup>st</sup> stage PCR)      |
| Faq_adapter_F       | GTGACTGGAGTTCAGACGTGTGCTC<br>TTCCGATCT                              | Two strands of FaqI_adapter for<br>SENECA                                                    |
| Faq_adapter_R       | AGCGAGATCGGAAGAGCACACGTCT<br>GAACTCCAGTCAC                          |                                                                                              |
| Faq_adapter_PRIMER  | GTGACTGGAGTTCAGACG                                                  | Anneals to FaqI_adapter<br>(SENECA 2 <sup>nd</sup> stage PCR)                                |
| CRISPR_array_for    | AGCGGGGATAAACCG                                                     | Anneals to CRISPR repeat<br>(SENECA 2 <sup>nd</sup> stage PCR)                               |
| KD263_Ist_F         | GTAATACGACTCACTATAGGGCACG<br>GTTGCGGAAATGTTACATTAAGGTT<br><u>GG</u> | The underlined region anneals to<br>the leader sequence<br>(supPCR 1 <sup>st</sup> stage)    |
| KD263_Ist_R         | GTAATACGACTCACTATAGGGCACG<br>GTTGCCCTCAGCAGCGAAAGACAG               | The underlined region anneals to<br>S <sup>g8</sup> spacer<br>(supPCR 1 <sup>st</sup> stage) |
| ITR_primer          | GTAATACGACTCACTATAGGGC                                              | Suppression primer<br>(supPCR 2 <sup>nd</sup> stage)                                         |

## Supplementary References

1. Shmakov, S., Savitskaya, E., Semenova, E., Logacheva, M.D., Datsenko, K.A. and Severinov, K. (2014) Pervasive generation of oppositely oriented spacers during CRISPR adaptation. *Nucleic Acids Res.* **42(9)**, 5907–5916
2. Datsenko, K.A., Pougach, K., Tikhonov, A., Wanner, B.L., Severinov, K. and Semenova, E. (2012) Molecular memory of prior infections activates the CRISPR/Cas adaptive bacterial immunity system. *Nat. Commun.* **3**, 945
3. Musharova, O., Sitnik, V., Vlot, M., Savitskaya, E., Datsenko, K.A., Krivoy, A. et al. (2019) Systematic analysis of Type I-E Escherichia coli CRISPR-Cas PAM sequences ability to promote interference and primed adaptation. *Mol. Microbiol.* **111(6)**, 1558–1570
4. Semenova, E., Savitskaya, E., Musharova, O., Strotskaya, A., Vorontsova, D., Datsenko, K.A. et al. (2016) Highly efficient primed spacer acquisition from targets destroyed by the Escherichia coli type I-E CRISPR-Cas interfering complex. *Proc. Natl. Acad. Sci. U.S.A.* **113(27)**, 7626–7631
5. Schmidt, F., Cherepkova, M.Y., Platt, R.J. (2018) Transcriptional recording by CRISPR spacer acquisition from RNA. *Nature.* **562(7727)**, 380–385
6. Morgan, M., Anders, S., Lawrence, M., Aboyoun, P., Pagès, H., Gentleman, R. (2009) ShortRead: a bioconductor package for input, quality assessment and exploration of high-throughput sequence data. *Bioinformatics.* **25(19)**, 2607–2608
7. Pagès, H., Aboyoun, P., Gentleman, R., DebRoy, S. (2017) Biostrings: Efficient manipulation of biological strings. R package version 2.46.0.
